# Supplementary material for: Lessons Learned from Developing Digital Teaching Modules for Medical Student Education in Neurosurgery during the COVID-19 Pandemic
Source: MDPI journal article supplement (doi:10.3390/healthcare9091141), 2021-09-01
Supplement: s1 [file s1]

**Rupa, R.; Pojskic, M.; et al.: Table S1.** Students' answers to the closed questions in an online survey assessing 9 digital teaching modules.

| Question / Statement                                                                     | Possible answers                                                                                                                                                                                                                                                                                                                                       | Most frequent answer                            |
|------------------------------------------------------------------------------------------|--------------------------------------------------------------------------------------------------------------------------------------------------------------------------------------------------------------------------------------------------------------------------------------------------------------------------------------------------------|-------------------------------------------------|
| The content of each module matches the topic.                                            | <ul style="list-style-type: none"> <li>Absolutely true</li> <li>True</li> <li>Less true</li> <li>Not true</li> </ul>                                                                                                                                                                                                                                   | Absolutely true                                 |
| The required knowledge of each module is clearly defined.                                | <ul style="list-style-type: none"> <li>Absolutely true</li> <li>True</li> <li>Less true</li> <li>Not true</li> </ul>                                                                                                                                                                                                                                   | True                                            |
| The learning objective of each module is clearly defined.                                | <ul style="list-style-type: none"> <li>Absolutely true</li> <li>True</li> <li>Less true</li> <li>Not true</li> </ul>                                                                                                                                                                                                                                   | True                                            |
| The common thread of each module is recognizeable.                                       | <ul style="list-style-type: none"> <li>Absolutely true</li> <li>True</li> <li>Less true</li> <li>Not true</li> </ul>                                                                                                                                                                                                                                   | Absolutely true                                 |
| Please rate how demanding the modules are, measured by your previous level of knowledge. | <ul style="list-style-type: none"> <li>The modules are much too demanding.</li> <li>The modules are demanding.</li> <li>The modules have exactly the right level.</li> <li>The modules are not very demanding.</li> <li>The modules are far too little demanding.</li> </ul>                                                                           | The modules have exactly the right level.       |
| Theoretical and practical aspects of each module are coordinated.                        | <ul style="list-style-type: none"> <li>Absolutely true</li> <li>True</li> <li>Less true</li> <li>Not true</li> </ul>                                                                                                                                                                                                                                   | True                                            |
| Current scientific discourses and findings are taken into account.                       | <ul style="list-style-type: none"> <li>Absolutely true</li> <li>True</li> <li>Less true</li> <li>Not true</li> </ul>                                                                                                                                                                                                                                   | True                                            |
| I feel to have achieved my learning objectives.                                          | <ul style="list-style-type: none"> <li>Absolutely true</li> <li>True</li> <li>Less true</li> <li>Not true</li> </ul>                                                                                                                                                                                                                                   | True                                            |
| Please let us know your opinion as to the number of the modules.                         | <ul style="list-style-type: none"> <li>I would like to see significantly more modules in the future.</li> <li>I would like to see more modules in the future.</li> <li>The number of modules is just right.</li> <li>I would like to see less modules in the future.</li> <li>I would like to see significantly less modules in the future.</li> </ul> | I would like to see more modules in the future. |
| I mainly access the teaching materials through:                                          | <ul style="list-style-type: none"> <li>A private computer at home.</li> <li>A private computer at the university.</li> <li>A public computer at the university.</li> <li>A public computer elsewhere.</li> <li>Another device.</li> </ul>                                                                                                              | A private computer at home.                     |

**Rupa, R.; Pojskic, M.; et al.: Table S1 (continued).** Students' answers to the closed questions in an online survey assessing 9 digital teaching modules.

|                                                                                      |                                                                                                                                                                                          |                                        |
|--------------------------------------------------------------------------------------|------------------------------------------------------------------------------------------------------------------------------------------------------------------------------------------|----------------------------------------|
| The graphics are clear.                                                              | <ul style="list-style-type: none"> <li>• Absolutely true</li> <li>• True</li> <li>• Less true</li> <li>• Not true</li> </ul>                                                             | Absolutely true                        |
| The text is easy to read.                                                            | <ul style="list-style-type: none"> <li>• Absolutely true</li> <li>• True</li> <li>• Less true</li> <li>• Not true</li> </ul>                                                             | Absolutely true                        |
| The media used are appropriate.                                                      | <ul style="list-style-type: none"> <li>• Absolutely true</li> <li>• True</li> <li>• Less true</li> <li>• Not true</li> </ul>                                                             | Absolutely true                        |
| In comparison to classical seminar lessons, the modules offer:                       | <ul style="list-style-type: none"> <li>• Less incentive to gain knowledge.</li> <li>• A similar incentive to gain knowledge.</li> <li>• A higher incentive to gain knowledge.</li> </ul> | A similar incentive to gain knowledge. |
| In comparison to classical seminar lessons, the modules convey the learning content: | <ul style="list-style-type: none"> <li>• Less clear.</li> <li>• Similarly clear.</li> <li>• Clearer.</li> </ul>                                                                          | Similarly clear.                       |
